# Supplementary material for: Investigating structural properties and reaction mechanism of non-stoichiometric spinel LNMOviasolid state NMR
Source: Royal Society of Chemistry journal article supplement (doi:10.1039/d3ta04649d), 2023-01-01
Supplement: d3ta04649d1.pdf [file d3ta04649d1.pdf]

# Supporting Information:

## Investigating structural properties and reaction mechanism of non-stoichiometric spinel LNMO via solid state NMR

Nahom Enkubahri Asres,<sup>†,‡</sup> Naiara Etxebarria,<sup>†</sup> Iciar Monterrubio,<sup>†,‡</sup> Damien Saurel,<sup>†</sup> Christian Fink Elkjær,<sup>¶</sup> Montse Casas-Cabanas,<sup>†,§</sup> Marine Reynaud,<sup>†</sup> Marcus Fehse,<sup>\*,†</sup> and Juan Miguel López del Amo<sup>\*,†</sup>

<sup>†</sup>*Center for Cooperative Research on Alternative Energies (CIC energiGUNE), Basque Research and Technology Alliance (BRTA), Alava Technology Park, Albert Einstein 48, 01510, Vitoria-Gasteiz, Spain*

<sup>‡</sup>*Department of Organic and Inorganic Chemistry, Faculty of Science and Technology, University of the Basque Country, UPV/EHU, B<sup>o</sup> Sarriena s/n, 48940 Leioa, Spain*

<sup>¶</sup>*Haldor A/S, Haldor Topsøes Allé 1, 2800 Kgs. Lyngby, Denmark*

<sup>§</sup>*Ikerbasque - Basque Foundation for Science, Maria Diaz de Haro 3, 48013 Bilbao, Spain*

E-mail: [marcus.fehse@umontpellier.fr](mailto:marcus.fehse@umontpellier.fr); [jmlopez@cicenergigune.com](mailto:jmlopez@cicenergigune.com)

1 **Magnetic measurements** The AC magnetic susceptibility and Magnetisation versus DC  
2 magnetic field at 5 K are presented in Fig. S1. According to [S1], and assuming spin only  
3 contribution to the magnetic moment (i.e. quenched orbital moment or infinite crystalline  
4 field) the magnetisation at saturation has the following dependency on the excess y of Mn:[S1,  
5 S2]

$$M_{sat} = g((1.5 - y)S_{Mn^{IV}} - (0.5 - y)S_{Ni^{II}} - 2yS_{Mn^{III}}) \quad (1)$$

6 Where  $S_{Mn^{IV}} = 1.5$ ,  $S_{Ni^{II}} = 1$  and  $S_{Mn^{III}} = 2$ . The excess Mn  $y$  can hence be calculated  
7 as:

$$y = \frac{3.5 - M_{sat}}{9} \quad (2)$$

8 The  $Mn^{3+}$  content  $2y$  calculated from magnetisation at saturation from eq. 2, and Curie  
9 temperature of LNMO-O-45 and LNMO-O-48 determined from Fig. S1 are compared in Fig.  
10 1(c) in the main manuscript.

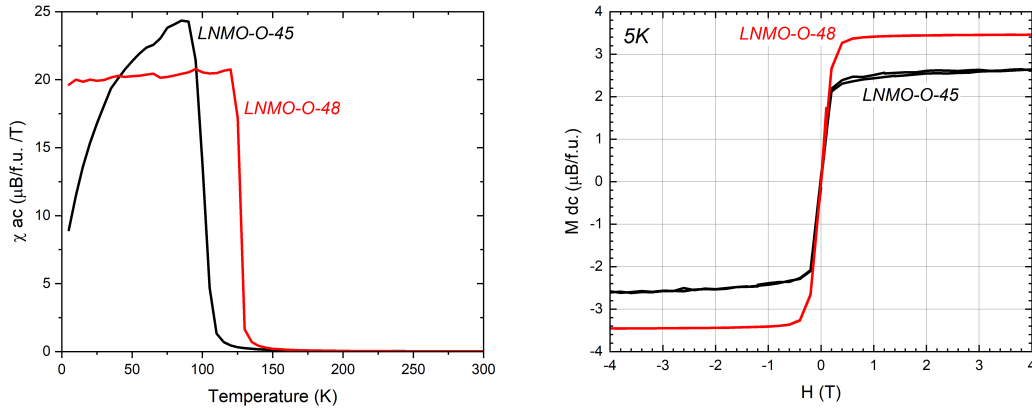

Figure S1: AC magnetic susceptibility versus temperature (left panel) and Magnetisation versus DC magnetic field at 5 K (right panel) of LNMO-O-45 and LNMO-O-48.

11 **SEM** Micrographs of secondary electron microscopy of the LNMO-O-45 and LNMO-O-48  
12 are compared in Fig. S2 left and right, respectively. The images reveal that both samples  
13 are composed of secondary spherical particles with an average diameter of  $\approx 8\mu m$ . The  
14 spherical secondary particles are composed of smaller primary polygonal shaped particles  
15 with dimension in the range of  $1.5\mu m$ .

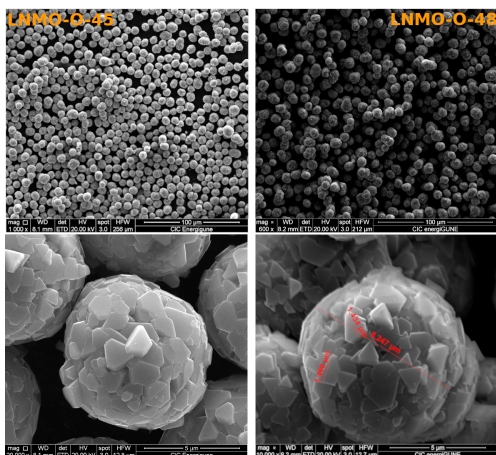

Figure S2: SEM micrographs of LNMO-O-45 (left) and LNMO-O-48 (right) at different at low (top) and high (bottom) magnification.

16 **NMR** In Fig S3, the complete  $^7\text{Li}$  NMR spectra of TM ordered near stoichiometric (LNMO-  
 17 O-48) and non stoichiometric LNMO-O-45 are presented. The rotational side bands are indi-  
 18 cated by star markers. It is salient that almost negligible diamagnetic Li containing species  
 19 such as  $\text{LiOH}$  or  $\text{Li}_2\text{CO}_3$  (expected signal around 0 ppm) are present in these materials,  
 20 confirming their purity.

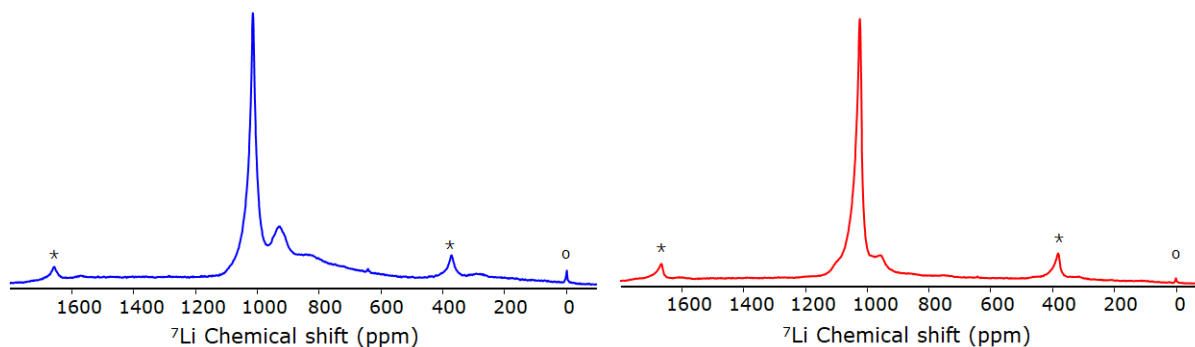

Figure S3:  $^7\text{Li}$  NMR spectra of pristine near stoichiometric LNMO-O-48 (right) and non-stoichiometric LNMO-O-45 (left) TM ordered LNMO samples.

21 Peak intensity (Int.), chemical shift (shift) and linewidth (LW) for the 4 components  
 22 identified in *ex situ*  $^7\text{Li}$  NMR during charge and discharge at distinct SOC ( $x$  in  $\text{Li}_x\text{NMO}$ )  
 23 are summarised in Tab. S1.

Table S1: Peak intensity of deconvoluted  $^7\text{Li}$  NMR spectra for LNMO-45 at distinct SOC

| SOC<br>/<br>Comp | x = 0.7 |       |       | x = 0.6 |       |       | x = 0.5 |       |       | x = 0.4 |       |       | x = 0.2 |       |       |
|------------------|---------|-------|-------|---------|-------|-------|---------|-------|-------|---------|-------|-------|---------|-------|-------|
|                  | Int.    | shift | LW    |
|                  | [%]     | [ppm] | [ppm] |
| Li1              | 100     | 1022  | 37    | 51      | 1018  | 38    | 32      | 1024  | 36    | 14      | 1019  | 63    | -       | -     | -     |
| S1               | 0       | -     | -     | 21      | 920   | 209   | 25      | 921   | 167   | 23      | 829   | 152   | 0       | -     | -     |
| S2               | 0       | -     | -     | 16      | 764   | 75    | 19      | 780   | 92    | 22      | 759   | 71    | 0       | -     | -     |
| Li0.5*           | 0       | -     | -     | 9       | 736   | 28    | 18      | 742   | 28    | 31      | 736   | 24    | 45      | 732   | 24    |
|                  | 0       | -     | -     | 3       | 725   | 12    | 6       | 730   | 11    | 10      | 725   | 12    | 8       | 727   | 8     |
|                  | 0       | -     | -     | -       | -     | -     | -       | -     | -     | -       | -     | -     | 47      | 740   | 111   |

\* two subcomponents used to account for asymmetry.

24 **NPD** Neutron diffraction patterns of pristine and cycled LNMO-O-45 samples are shown  
 25 in Fig. S4. The refinement parameters for the two pristine LNMO are shown in Tab. S2.  
 26 The patterns of pristine LNMO, end of charge (EOC), end of discharge (EOD) and after 11  
 27 complete cycles greatly overlap without any additional features appearing. This underlines  
 28 the structural stability of the spinel phase upon reversible delithiation and delithiation. It is  
 29 noteworthy that also superstructural features reflecting the TM order are maintained upon  
 30 cycling indicated by dashed vertical lines in the inset of Fig. S4. For the EOC sample,  
 31 which was stopped towards end of complete delithiation, a shift of diffraction features to  
 32 higher angle is observed which reflects the lattice shrinkage upon delithiation. It should be  
 33 noted that this pattern was acquired at another beamline which results in different angular  
 34 range, resolution and signal to noise ratio. The increased background for the cycled samples  
 35 compared to pristine is result of scattering contribution of electrode additives.

36 **XRD** A close-up of the *operando* x-ray diffraction peak evolution in the range of  $0.6 < x < 0.4$   
 37 can be seen in Fig. S5 in which the fading of one and the simultaneous emergence of a new  
 38 peak reflects the biphasic transformation from Li1 to Li0.5 phase.

39 **Ex situ NMR electrochemistry** The electrochemical cycling curves of each of the *ex*  
 40 *situ* NMR samples stopped at distinct SoC are depicted in Fig. S6 and S7 for charge and

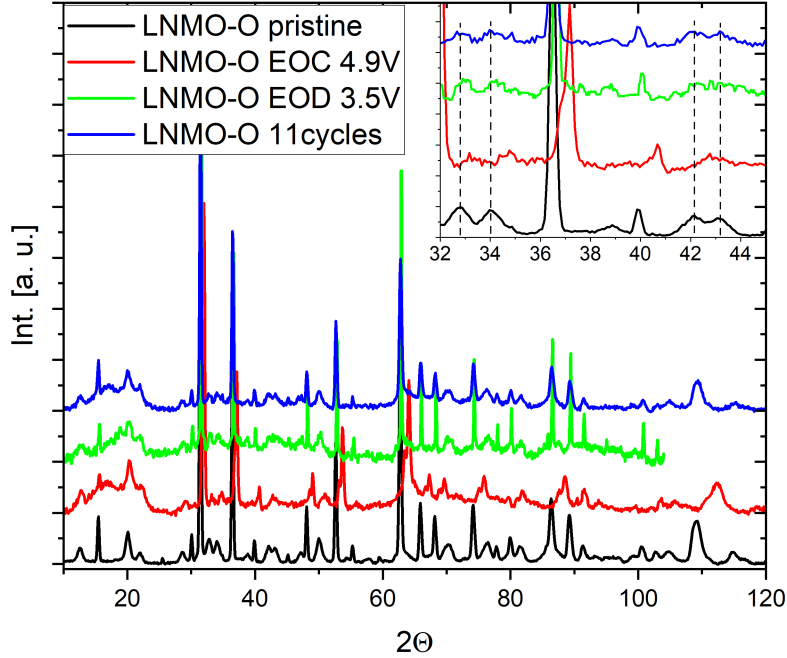

Figure S4: Neutron diffraction patterns of pristine, fully charged (EOC), after one complete cycle (EOD) and after 11 complete cycles. Inset shows the position of superstructural features by vertically dashed lines .

41 discharge, respectively.

42 Two distinct trends can be observed in the Fig S8. On the one hand the progressive  
 43 transformation from thermodynamically stable Li1 prevalent until SoC  $x \approx 0.7$  to Li0.5 phase  
 44 upon delithiation represented by a decline in intensity of the former and a rise in intensity  
 45 of the latter. Both of which have narrow spectral features and are not experiencing any  
 46 significant chemical shift upon delithiation/ lithiation which can be attributed to the con-  
 47 stant lattice parameter and the prevalence of a single Ni environment (either  $\text{Ni}^{2+}$  or  $\text{Ni}^{3+}$ )  
 48 phase [S3]. On the other hand the intermediate species S1 and S2 which form during the  
 49 biphasic transition of the Li1 to Li0.5 transformation and reach their relative maxima, con-  
 50 tributing almost half of the overall intensity, at about  $x \approx 0.5$ , are clearly distinct from the  
 51 thermodynamic stable phases. Firstly and foremost, they are much broader which suggests

Table S2: Additional Rietveld refinement parameters of the neutron powder diffraction data.

| Material                                        | LNMO-O-48             | LNMO-O-45          |
|-------------------------------------------------|-----------------------|--------------------|
| <b>spacegroup</b>                               | $P4_332$              | $P4_332$           |
| <b>Fractional coordinates</b>                   |                       |                    |
| Mn/Ni x (12d)                                   | 0.125                 | 0.125              |
| Mn/Ni y (12d)                                   | 0.369(2)              | 0.381(4)           |
| Mn/Ni z (12d)                                   | 0.873(2)              | 0.870(4)           |
| Mn/Ni x,y,z (4b)                                | 0.625                 | 0.625              |
| Li x,y,z (8c)                                   | 0.003(2)              | 0.005(4)           |
| O1 x,y,z (8c)                                   | 0.3838(3)             | 0.3847(6)          |
| O2 x (24e)                                      | 0.1505(3)             | 0.1497(8)          |
| O2 y (24e)                                      | 0.8580(3)             | 0.8580(9)          |
| O2 z (24e)                                      | 0.1242(4)             | 0.1247(7)          |
| <b>Occupancies</b> *                            |                       |                    |
| Mn (12d)                                        | 1.5                   | 1.5                |
| Ni/Mn (4b)                                      | 0.4826(7) / 0.0174(7) | 0.454(3)/ 0.046(3) |
| <b>Thermal movement</b> Biso ( $\text{\AA}^2$ ) |                       |                    |
| Mn (12d)                                        | 0.35(6)               | 0.5(2)             |
| Ni/Mn (4b)                                      | 0.48(7)               | 0.7(2)             |
| Li(8c)                                          | 1.0(1)                | 1.2(4)             |
| O1(8c)                                          | 0.14(5)               | 0.4(2)             |
| O2 (24e)                                        | 0.32(3)               | 0.55(7)            |
| <b>Quality indicators</b>                       |                       |                    |
| $R_p$                                           | 22.3                  | 8.17               |
| $R_{wp}$                                        | 16.5                  | 8.72               |
| $R_e$                                           | 1.56                  | 1.26               |

\* Sum of TM has been constrained

\*\* Values without errors were fixed during the fit.

52 the presence of various Li environments, in this case a mix of  $\text{Ni}^{2+}$  and  $\text{Ni}^{3+}$ . Secondly, they  
53 experience a shift to lower ppm with increasing SoC, albeit much more pronounced for the  
54 S1 than for S2 which merges into the thermodynamically stable Li0.5 when approaching end  
55 of  $\text{Ni}^{3+}$  formation . This strong change in chemical shift of S1 may suggest a continuous,  
56 smooth transition between the main phases Li1 and Li0.5, with the presence of an intermedi-  
57 ate lattice parameter (i.e. in S1 and S2), lithiation state, and TM oxidation state, reflecting  
58 an extended phase boundary region and varying Li solubility limit. The formation of such  
59 intermediate species during biphasic phase transition have been reported to be beneficial for  
60 rapid phase transition in LFP [S4, S5].

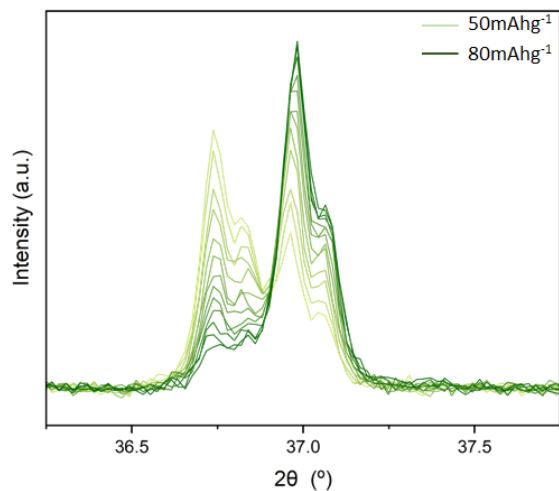

Figure S5: Evolution of *operando* XRD patterns of sample LNMO-O-45 in range of 50 (light green) to 80 mAh/g (dark green) ( $\approx 0.6 \leq x \leq 0.4$ ) during charge, corresponding to the end of first lithiation plateau ( $\text{Ni}^{2+}$  to  $\text{Ni}^{3+}$  transformation).

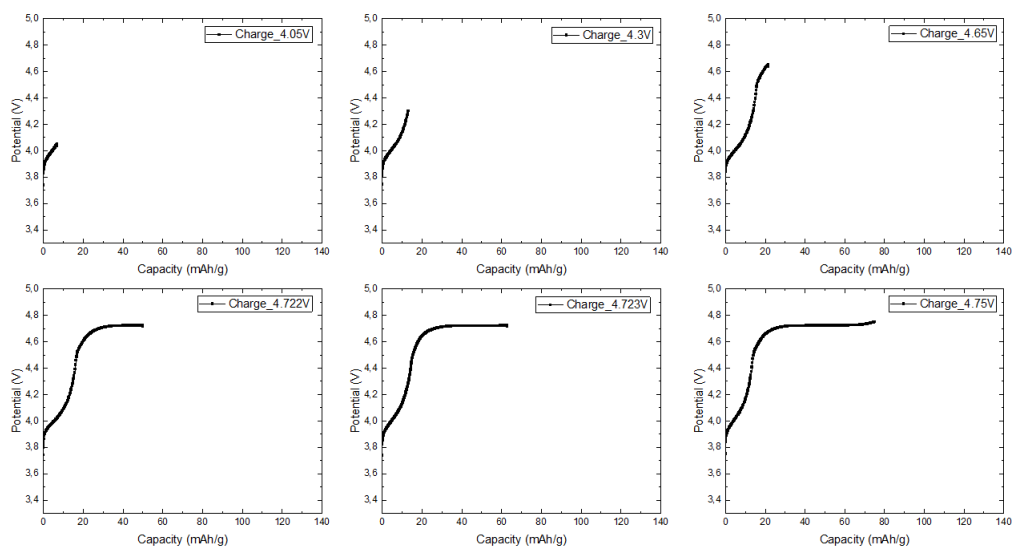

Figure S6: *Ex situ* electrochemistry during charge

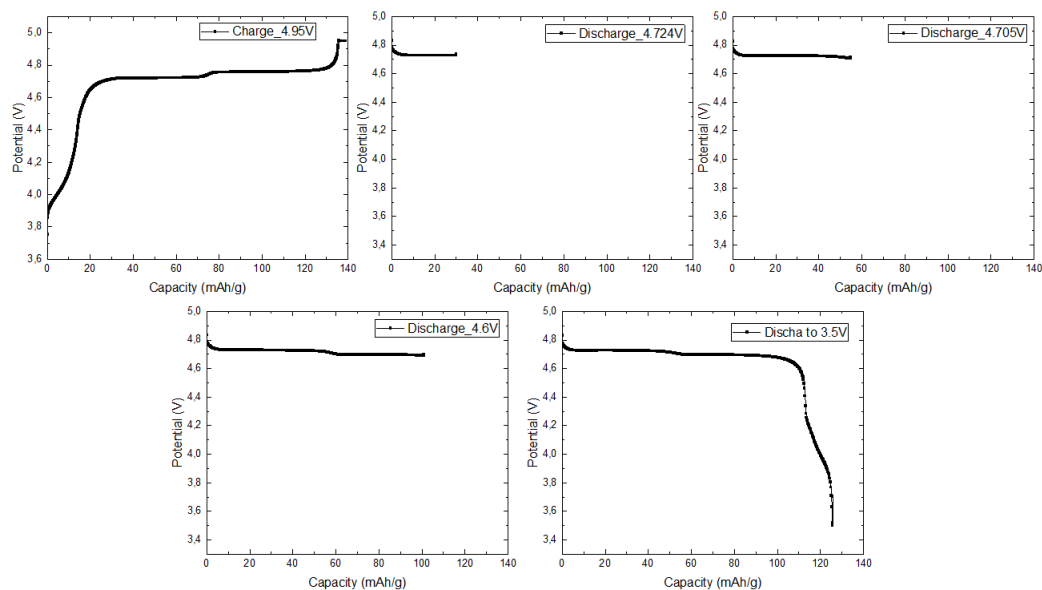

Figure S7: *Ex situ* electrochemistry during discharge

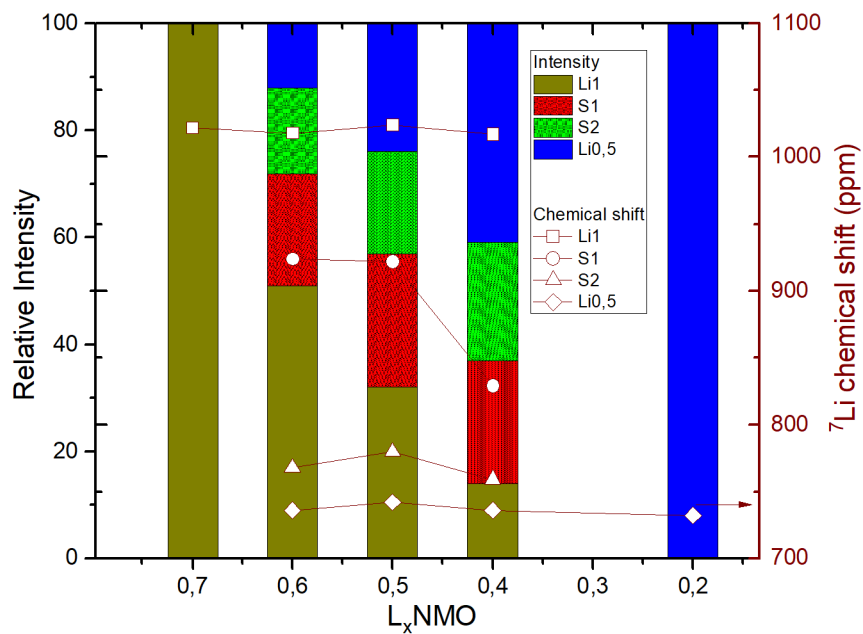

Figure S8: Relative peak intensities (bars) and chemical shift (hollow markers) of selected *ex situ*  ${}^7\text{Li}$  NMR spectra at distinct SoC during charge and discharge.



## References

- (S1) Moorhead-Rosenberg, Z.; Chemelewski, K. R.; Goodenough, J. B.; Manthiram, A. Magnetic measurements as a viable tool to assess the relative degrees of cation ordering and Mn<sup>3+</sup> content in doped LiMn<sub>1.5</sub>Ni<sub>0.5</sub>O<sub>4</sub> spinel cathodes. *J. Mater. Chem. A* **2013**, *1*, 10745–10752.
- (S2) Amdouni, N.; Zaghieb, K.; Gendron, F.; Mauger, A.; Julien, C. Magnetic properties of LiNi<sub>0.5</sub>Mn<sub>1.5</sub>O<sub>4</sub> spinels prepared by wet chemical methods. *Journal of Magnetism and Magnetic Materials* **2007**, *309*, 100–105.
- (S3) Komatsu, H.; Arai, H.; Koyama, Y.; Sato, K.; Kato, T.; Yoshida, R.; Murayama, H.; Takahashi, I.; Oriyasa, Y.; Fukuda, K.; Hirayama, T.; Ikuhara, Y.; Ukyo, Y.; Uchimoto, Y.; Ogumi, Z. Solid Solution Domains at Phase Transition Front of Li<sub>x</sub>Ni<sub>0.5</sub>Mn<sub>1.5</sub>O<sub>4</sub>. *Advanced Energy Materials* **2015**, *5*, 1500638, [\\_eprint: https://onlinelibrary.wiley.com/doi/pdf/10.1002/aenm.201500638](https://onlinelibrary.wiley.com/doi/pdf/10.1002/aenm.201500638).
- (S4) Liu, H.; Strobridge, F. C.; Borkiewicz, O. J.; Wiaderek, K. M.; Chapman, K. W.; Chupas, P. J.; Grey, C. P. Capturing metastable structures during high-rate cycling of LiFePO<sub>4</sub> nanoparticle electrodes. *Science* **2014**, *344*, 1252817.
- (S5) Oriyasa, Y.; Maeda, T.; Koyama, Y.; Murayama, H.; Fukuda, K.; Tanida, H.; Arai, H.; Matsubara, E.; Uchimoto, Y.; Ogumi, Z. Transient Phase Change in Two Phase Reaction between LiFePO<sub>4</sub> and FePO<sub>4</sub> under Battery Operation. *Chemistry of Materials* **2013**, *25*, 1032–1039.
